# Supplementary material for: Tertiary lymphoid structures show infiltration of effective tumor‐resident T cells in gastric cancer
Source: PubMed Central journal article supplement — Cancer Sci. 2021 Apr 1;112(5):1746–57. doi: 10.1111/cas.14888 (PMC8088970; doi:10.1111/cas.14888), 2021-04-01
Supplement: CAS-112-1746-s001.pdf [file CAS-112-1746-s001.pdf]

Fig. S1

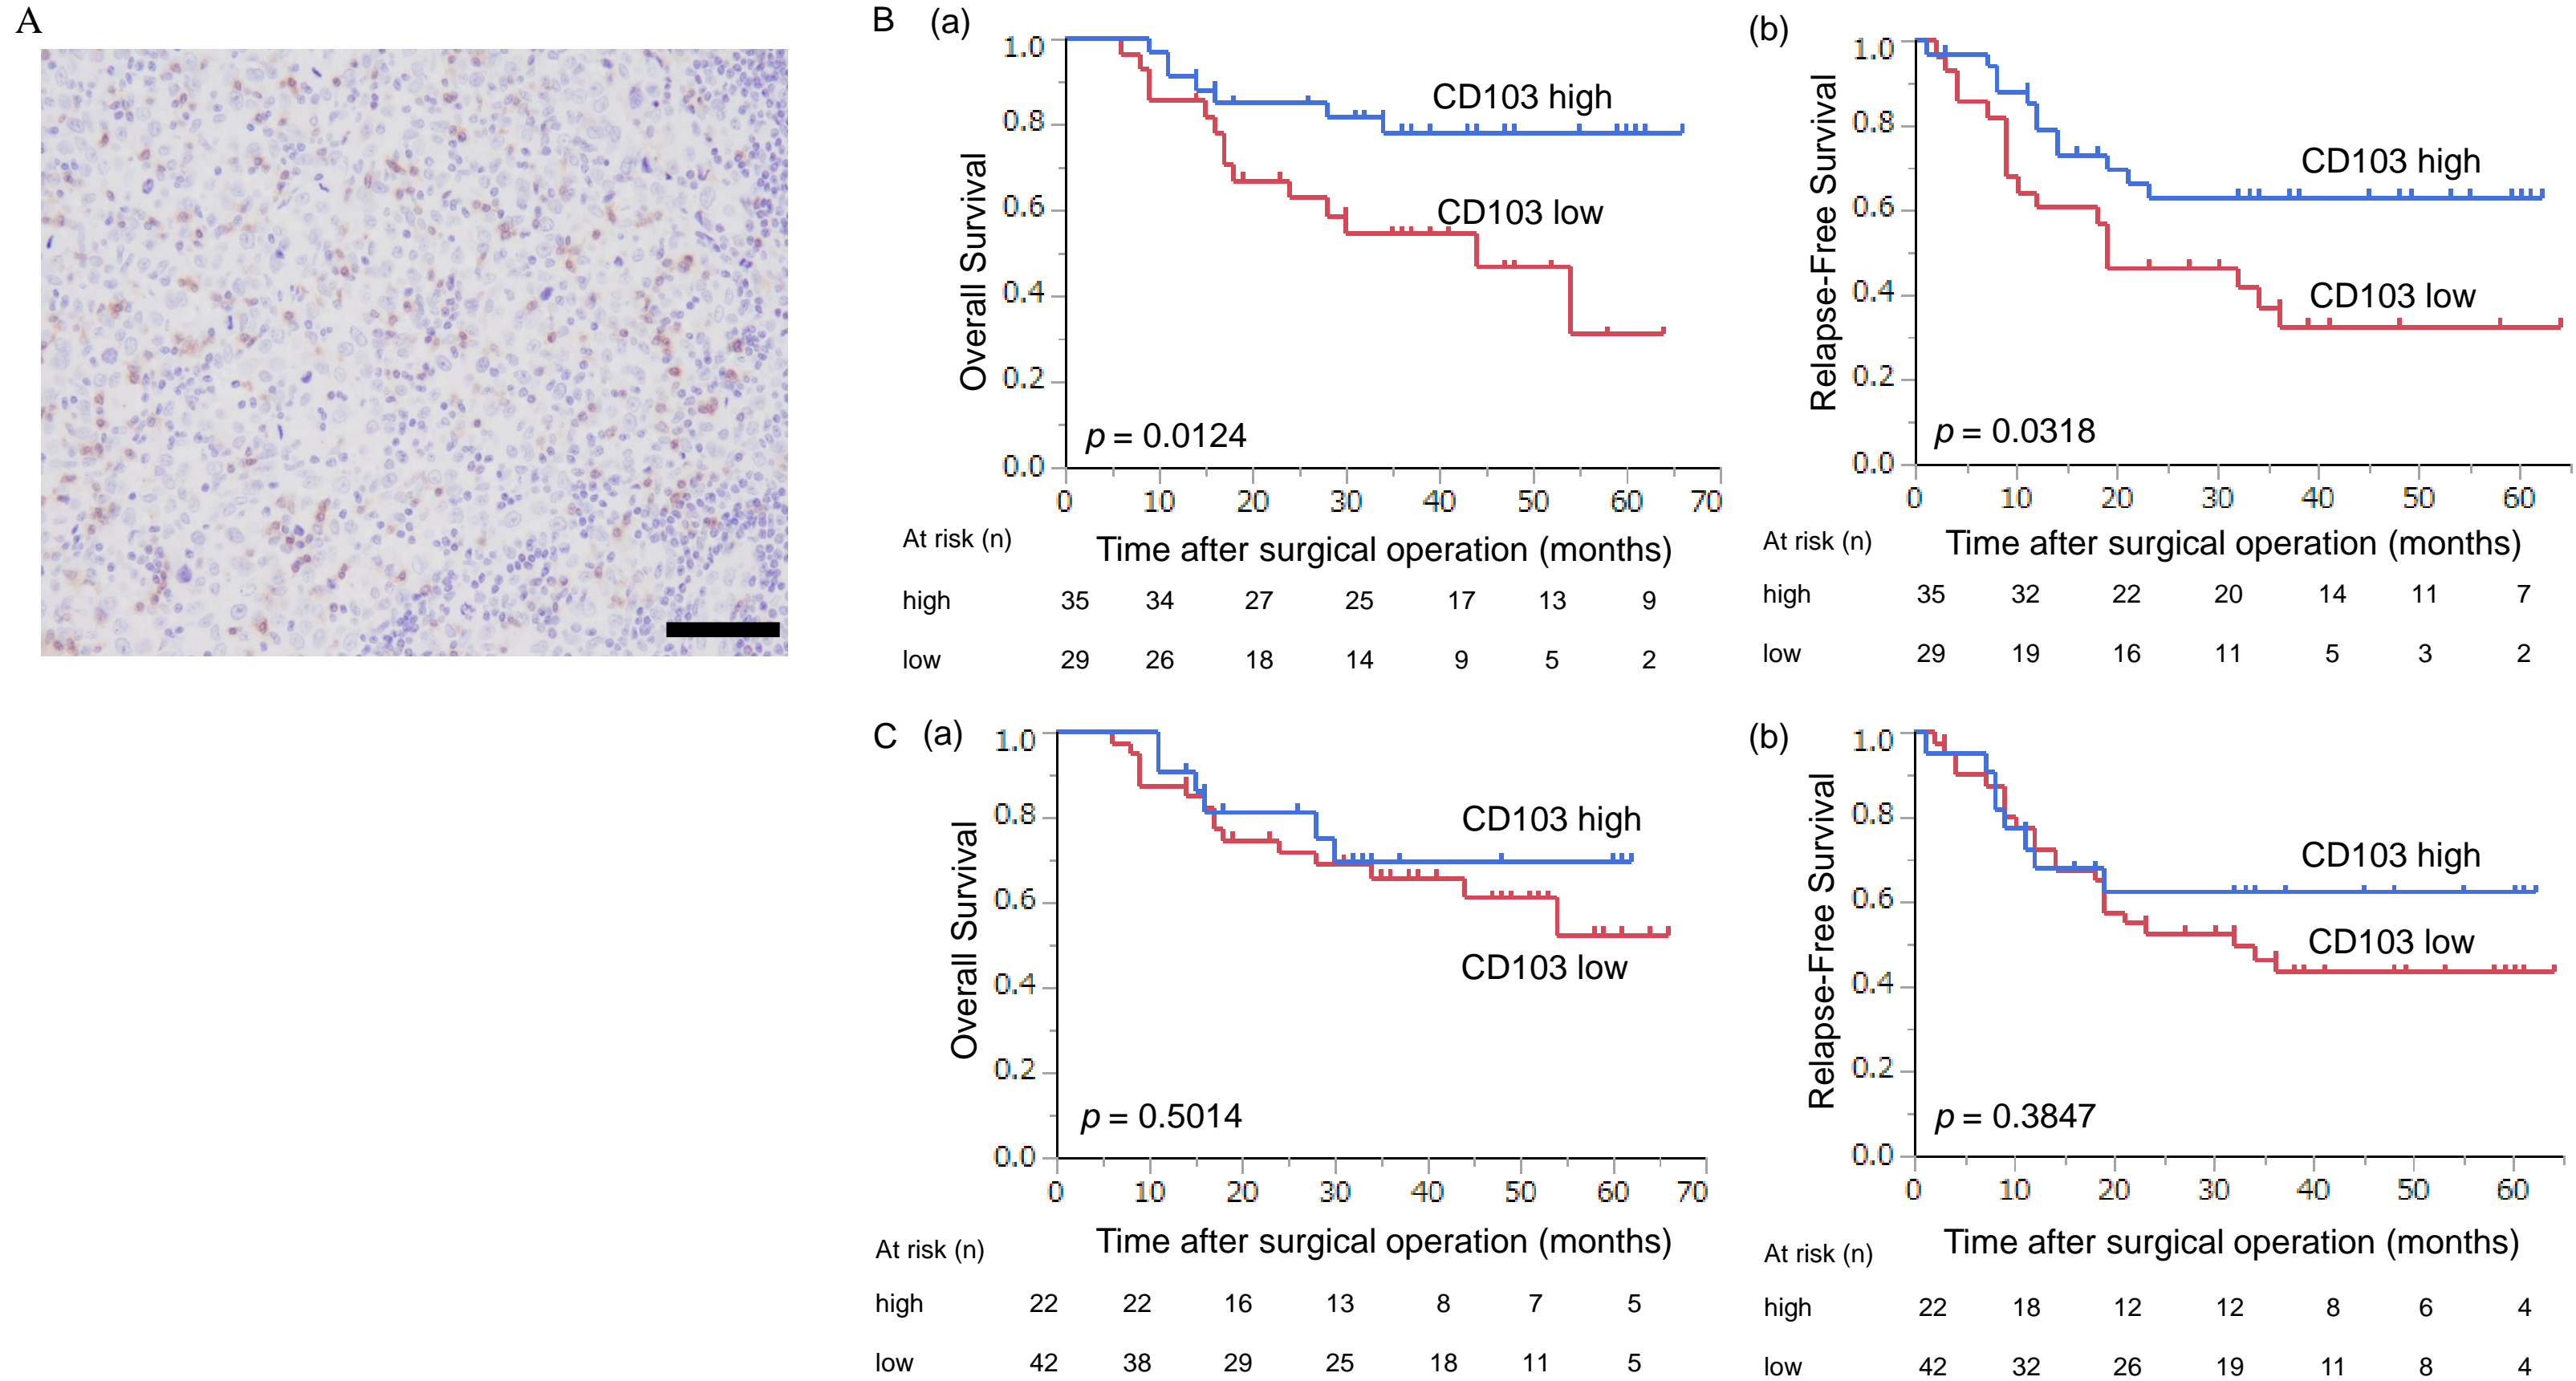

Figure S1 Comparison of the prognostic impact of CD103<sup>+</sup> T cells in the primary tumor and metastatic lymph nodes in patients with pathological N2 or higher (A) Representative image of CD103 staining of metastatic lymph nodes is shown. Scale bar; 50  $\mu$ m. (B) Kaplan-Meier plots using the log-rank test for OS and RFS according to the number of CD103<sup>+</sup> T cells in primary tumors and (C) metastatic lymph nodes. In the primary tumor, patients with CD103 high had a better prognosis than those with CD103 low (a: OS;  $p = 0.0124$ , b: RFS;  $p = 0.0318$ ). On the other hand, in metastatic lymph nodes, no significant difference was present.
